# Supplementary material for: Which phenotypic traits of resistance should be improved in cattle to control paratuberculosis dynamics in a dairy herd: a modelling approach
Source: Springer Nature journal article supplement (doi:10.1186/s13567-017-0468-8), 2017-10-10
Supplement: MOESM1 [file 13567_2017_468_MOESM1_ESM.pdf]

# Additional file 1: Description of the used within herd model of Map Spread

## A Equations for the within-herd dynamic

The description of the model we used corresponds to the within-herd model described in [2] and based on [11]. The set of parameters used are described in tables 1, 2 and 3.

### Notations

In the following equations,  $X_{(t,a)}$  is the number of animals in health state  $X$  at time  $t$  and age  $a$ . Age is given in weeks until the entry in the adult stage (from 1 to  $cal$ , with intermediary stages  $w$  for weaning age,  $y$  for young heifers age,  $h$  for heifers age and  $u$  for maximal age in the susceptible compartments), then by age group ( $P_1$  to  $P_{5+}$ ). Some variables can have a prefix: "b" for births in health states  $X$  ( $bX$ ), "N" for animals transiting between two health states ( $NX$ ) and "s" for exits (mortality and culling) ( $sX$ ). After entering the adult stage, flows corresponding to aging are noted using a superscript  $ng$ , whereas those remaining in the same age group are noted using a superscript  $sg$ .  $N_{(t,a)}$  is the number of animals of age  $a$  at time  $t$ . Average duration in health states are noted by  $v_X$ . The remaining terms used are defined when introduced.

### Equations for the updating of variables describing health states

In this section we introduce the equations for the updating of variables corresponding to the health states, for a given herd  $i$ .

#### Susceptible ( $S$ ) and No more Susceptible ( $R$ )

$$S_{(t+1,a=1)} = bS_{(t)} - NT_{(t+1,a)}$$

$$S_{(t+1,a \in [2;52])} = [S_{(t,a-1)} - sS_{(t,a-1)}] - NT_{(t+1,a)}$$

$$R_{(t+1,53)} = S_{(t,52)} - sS_{(t,52)}$$

$$R_{(t+1,a \in [54;cal])} = R_{(t,a-1)} - sR_{(t,a-1)}$$

—

$$R_{(t+1,P_1)} = R_{(t,P_1)}^{sg} - sR_{(t,P_1)}^{sg} + R_{(t,cal)} - sR_{(t,cal)}$$

$$R_{(t+1,P_i \in [P_2;P_4])} = R_{(t,P_i)}^{sg} - sR_{(t,P_i)}^{sg} + R_{(t,P_{i-1})}^{ng} - sR_{(t,P_{i-1})}^{ng}$$

$$R_{(t+1,P_{5+})} = R_{(t,P_{5+})} - sR_{(t,P_{5+})} + R_{(t,P_4)}^{ng} - sR_{(t,P_4)}^{ng}$$

### Transiently infected ( $T$ )

$$T_{(t+1,a=1)} = bT_{(t)} + NT_{(t+1,a)}$$

$$T_{(t+1,a \in [2;52])} = [T_{(t,a-1)} - sT_{(t,a-1)}] - NL_{(t+1,a)} + NT_{(t+1,a)}$$

$$T_{(t+1,a \in [53;cal])} = [T_{(t,a-1)} - sT_{(t,a-1)}] - NL_{(t+1,a)}$$

### Latently infected ( $L$ )

$$L_{(t+1,a=2)} = NL_{(t+1,a)}$$

$$L_{(t+1,a \in [3;h])} = [L_{(t,a-1)} - sL_{(t,a-1)}] + NL_{(t+1,a)}$$

$$L_{(t+1,a \in [h+1;cal])} = [L_{(t,a-1)} - sL_{(t,a-1)}] - NIs_{(t+1,a)} + NL_{(t+1,a)}$$

—

$$L_{(t+1,P_1)} = [L_{(t,P_1)}^{sg} - sL_{(t,P_1)}^{sg} + L_{(t,cal)} - sL_{(t,cal)} + T_{(t,cal)} - sT_{(t,cal)}] - NIs_{(t+1,P_1)}$$

$$L_{(t+1,P_i \in [P_2;P_4])} = [L_{(t,P_i)}^{sg} - sL_{(t,P_i)}^{sg} + L_{(t,P_{i-1})}^{ng} - sL_{(t,P_{i-1})}^{ng}] - NIs_{(t+1,P_i)}$$

$$L_{(t+1,P_{5+})} = [L_{(t,P_{5+})} - sL_{(t,P_{5+})} + L_{(t,P_4)}^{ng} - sL_{(t,P_4)}^{ng}] - NIs_{(t+1,P_{5+})}$$

### Moderate shedding ( $Is$ )

$$Is_{(t+1,a=h+1)} = NIs_{(t+1,a)}$$

$$Is_{(t+1,a \in [h+2;cal])} = [Is_{(t,a-1)} - sIs_{(t,a-1)}] - NIs_{(t+1,a)} + NIs_{(t+1,a)}$$

—

$$Is_{(t+1,P_1)} = [Is_{(t,P_1)}^{sg} - sIs_{(t,P_1)}^{sg} + Is_{(t,cal)} - sIs_{(t,cal)}] - NIs_{(t+1,P_1)} + NIs_{(t+1,P_1)}$$

$$Is_{(t+1,P_i \in [P_2;P_4])} = [Is_{(t,P_i)}^{sg} - sIs_{(t,P_i)}^{sg} + Is_{(t,P_{i-1})}^{ng} - sIs_{(t,P_{i-1})}^{ng}]$$

$$- NIs_{(t+1,P_i)} + NIs_{(t+1,P_i)}$$

$$Is_{(t+1,P_{5+})} = [Is_{(t,P_{5+})} - sIs_{(t,P_{5+})} + Is_{(t,P_4)}^{ng} - sIs_{(t,P_4)}^{ng}] - NIs_{(t+1,P_{5+})} + NIs_{(t+1,P_{5+})}$$

### High shedding and clinically affected ( $Ic$ )

$$Ic_{(t+1,a=h+2)} = NIs_{(t+1,a)}$$

$$Ic_{(t+1,a \in [h+3;cal])} = [Ic_{(t,a-1)} - sIc_{(t,a-1)}] + NIs_{(t+1,a)}$$

—

$$Ic_{(t+1,P_1)} = [Ic_{(t,P_1)}^{sg} - sIc_{(t,P_1)}^{sg} + Ic_{(t,cal)} - sIc_{(t,cal)}] + NIs_{(t+1,P_1)}$$

$$Ic_{(t+1,P_i \in [P_2;P_4])} = [Ic_{(t,P_i)}^{sg} - sIc_{(t,P_i)}^{sg} + Ic_{(t,P_{i-1})}^{ng} - sIc_{(t,P_{i-1})}^{ng}] + NIs_{(t+1,P_i)}$$

$$Ic_{(t+1,P_{5+})} = [Ic_{(t,P_{5+})} - sIc_{(t,P_{5+})} + Ic_{(t,P_4)}^{ng} - sIc_{(t,P_4)}^{ng}] + NIs_{(t+1,P_{5+})}$$

## Equations describing flows

New incoming (and outgoing) flows in each health states are mainly drawn using binomial laws.

### Births ( $bX$ )

At each time step  $t$ , births are calculated with regards to the health state of the dam. These births are then distributed into  $S$  and  $T$  states

$$bS_{(t)} = bS_{(t)}^R + bS_{(t)}^L + bS_{(t)}^{Is} + bS_{(t)}^{Ic} \quad \text{et} \quad bT_{(t)} = bT_{(t)}^L + bT_{(t)}^{Is} + bT_{(t)}^{Ic},$$

where  $bS_{(t)}^X$  et  $bT_{(t)}^X$  ( $X \in R, L, Is, Ic$ ) represent the number of births at time  $t$  from cows in health state  $X$ :

$$\begin{aligned} bS_{(t)}^R &\sim Bin \left( R_{(t,cal)} + \sum_{i=1}^{i=5} [R_{(t,P_i)}^{ng}]; 1 - \sigma_B \right) \\ bS_{(t)}^L &= nbV_{(t)}^L - bT_{(t)}^L, \quad bT_{(t)}^L \sim Bin \left( nbV_{(t)}^L; p_L * \varphi_{pLIs} \right) \\ bS_{(t)}^{Is} &= nbV_{(t)}^{Is} - bT_{(t)}^{Is}, \quad bT_{(t)}^{Is} \sim Bin \left( nbV_{(t)}^{Is}; p_{Is} * \varphi_{pLIs} \right) \\ bS_{(t)}^{Ic} &= nbV_{(t)}^{Ic} - bT_{(t)}^{Ic}, \quad bT_{(t)}^{Ic} \sim Bin \left( nbV_{(t)}^{Ic}; p_{Ic} * \varphi_{pIc} \right) \end{aligned}$$

In equations above,  $nbC_{(t)}^X$  is the number of female calves alive born at time  $t$ . It is obtained from  $nbV_{(t)}^X$ , the number of female calves born at time  $t$ , from cows in the health state  $X$ :

$$\begin{aligned} nbV_{(t)}^L &\sim Bin \left( L_{(t,cal)} + T_{(t,cal)} + \sum_{i=1}^{i=5} [L_{(t,P_i)}^{ng}]; 1 - \sigma_B \right) \\ nbV_{(t)}^{Is} &\sim Bin \left( Is_{(t,cal)} + \sum_{i=1}^{i=5} [Is_{(t,P_i)}^{ng}]; 1 - \sigma_B \right) \\ nbV_{(t)}^{Ic} &\sim Bin \left( Ic_{(t,cal)} + \sum_{i=1}^{i=5} [Ic_{(t,P_i)}^{ng}]; 1 - \sigma_B \right) \end{aligned}$$

We note that at the age of moving in the adult group ( $cal$ ), all the animals in the health state  $T$  enter the health state  $L$  ( $L_{(t,cal)} = L_{(t,cal)} + T_{(t,cal)}$ ).  $\varphi_{p_x}$  is a factor, varying from 100% to 0%, of decrease in probability of in utero transmission where  $x$  correspond to the dam giving birth in health states  $L$  and  $Is$  ( $\varphi_{pLIs}$ ) or  $Ic$  ( $\varphi_{pIc}$ ).

### Change in age group ( $X^x$ )

$$\begin{aligned} X_{(t,P_i)} &= X_{(t,P_i)}^{sg} + X_{(t,P_i)}^{ng} \\ X_{(t,P_i)}^{ng} &\sim Bin \left( X_{(t,P_i)}; \frac{1}{\tau_{aa}} \right) \quad ; \quad \text{where } X = \{R, L, Is, Ic\}, \end{aligned}$$

and  $\tau_{aa}$  is the average time spent in each of age group  $P_1$  to  $P_4$ .

## Exits ( $sX$ )

The mortality of calves during the first week of life is applied at birth and defined above in the section concerning births.

From age 1 to  $cal$ , mortality and culling rates  $\sigma_x$  are defined as:

- $a \in \{1; 2\} \rightarrow \sigma_x = \sigma_{c1}$
- $a \in [3; w] \rightarrow \sigma_x = \sigma_{c2}$
- $a \in [w + 1; cal] \rightarrow \sigma_x = \sigma_{c3}$

Then, exits following death and culling write as:

for  $a = 1$  :

$$sX_{(t,a)} \sim Bin\left(X_{(t,a)}; \sigma_x\right), \quad \text{where } X = \{S, T\},$$

for  $a \in [2; 4]$  :

$$sX_{(t,a)} = sale + death, \quad \text{where } X = \{S, T, L\}$$

$$sale \sim Bin\left(X_{(t,a)}; \sigma_m\right)$$

$$death \sim Bin\left(X_{(t,a)} - sale; \sigma_x\right)$$

for  $a \in [5; cal - 11]$  :

$$sX_{(t,a)} \sim Bin\left(X_{(t,a)}; \sigma_x\right) \quad ; \quad X = \{S, R, T, L\}$$

for  $a = cal - 10$ , we consider management by heifers (safe management, keep all female calves):

$$Cows_{(t)} = \sum_{i=1}^5 R_{(t,P_i)} + \sum_{i=1}^5 L_{(t,P_i)} + \sum_{i=1}^5 Is_{(t,P_i)} + \sum_{i=1}^5 Ic_{(t,P_i)}$$

$$Heifers_{(t)} = \sum_{a=1}^u S_{(t,a)} + \sum_{a=u+1}^{cal} R_{(t,a)} + \sum_{a=1}^{cal} T_{(t,a)} + \sum_{a=1}^{cal} L_{(t,a)} + \sum_{a=1}^{cal} Is_{(t,a)} + \sum_{a=1}^{cal} Ic_{(t,a)}$$

If the number of heifers,  $Heifers_{(t)}$ , is greater than  $K_g$  or that the number of cows,  $Cows_{(t)}$ , is greater than  $K_v$ , we consider the sale of heifers:

$$sX_{(t,a)} = sale + death \quad ; \quad X = \{R, T, L, Is, Ic\}$$

$$sale \sim Bin\left(X_{(t,a)}; \exp\left(-\sigma_h \cdot (Cows_{(t)}/K_v)^6\right) \cdot ((Heifers_{(t)}/K_g)^6)\right)$$

$$death \sim Bin\left(X_{(t,a)} - sale; \sigma_x\right)$$

where  $K_v$  is the capacity of the holding in number of cows (see Table 1) and  $K_g = \sigma_P * K_v * (cal - h)$  is the capacity of the holding in number of heifers.

Otherwise, we do not consider the sale of heifers:

$$sX_{(t,a)} \sim Bin\left(X_{(t,a)}; \sigma_x\right)$$

for  $a \in [cal - 9; cal]$ :

$$sX_{(t,a)} = Bin\left(X_{(t,a)}; \sigma_x\right)$$

for  $a \in [P_1; P_{5+}]$ :

$$sX_{(t,P_i)}^x \sim Bin\left(X_{(t,P_i)}^x; \sigma_{P_i}\right), \quad \text{where } X = \{R, L, Is\},$$

$$sIc_{(t,P_i)}^x \sim Bin\left(Ic_{(t,P_i)}^x; \frac{1}{v_{Ic}}\right)$$

where  $v_{Ic}$  corresponds to the average time spent in the health state  $Ic$ .

### New infections ( $S \rightarrow T$ , except for *in-utero* transmission)

We have:

$$nT_{(t+1,a)} = inf_{(t+1,a)}^c + inf_{(t+1,a)}^m + inf_{(t+1,a)}^l + inf_{(t+1,a)}^g$$

Superscripts correspond to different possible routes of transmission, respectively colostrum ( $c$ ), milk ( $m$ ), local environment ( $l$ ) and global environment ( $g$ ). New infections by *in-utero* transmission are accounted for through births.

By age, the possible routes of infection are:

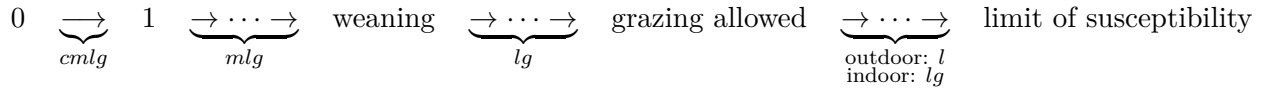

### Transmission through colostrum

It is considered that calves drink colostrum from their mothers during the first three days before drinking milk:

$$inf_{(t+1,a=1)}^c = \sum_1^{bS_{(t)}^{Is}} \left[ Bern\left(1 - \exp\left(-\frac{\beta_l q_c^{Is}}{\alpha}\right)\right) \right] + \sum_1^{bS_{(t)}^{Ic}} \left[ Bern\left(1 - \exp\left(-\frac{\beta_l q_c^{Ic}}{\alpha}\right)\right) \right],$$

with

$$q_c^{Is} \sim Bern(sh_{Is}) \times \left[ 3 \times b \left( 10^5 \cdot Beta(8; 8) + 1 + 10^3 \cdot Beta(1; 25) \right) \right] * \varphi Milk_{Is},$$

$$q_c^{Ic} \sim Bern(sh_{Ic}) \times \left[ 3 \times b \left( 10^5 \cdot Beta(8; 8) + 10^{(3+10 \cdot Beta(50; 200))} \right) \right] * \varphi Milk_{Ic}.$$

Where  $\varphi Milk_x$  is a factor, varying from 100% to 0%, of decrease in quantity of bacteria shed in colostrum and milk by an animal in health state  $x$  (here  $x$  could be  $Is$  or  $Ic$ )

## Transmission through milk

Regarding the age, we have:

$$a = 1 : \quad inf_{(t+1,a)}^m \sim Bin \left( bS; 1 - \exp \left( -\frac{\beta_l q_l \frac{4}{7}}{\alpha} \right) \right),$$

$$a \in \{2; w\} : \quad inf_{(t+1,a)}^m \sim Bin \left( [S_{(t,a-1)} - sS_{(t,a-1)}]; \left[ 1 - \exp \left( -e^{(-\gamma(a-1))} \cdot \frac{\beta_l q_l}{\alpha} \right) \right] \right),$$

with

$$q_l = \frac{7 \times d \times (Q_{I_s(t)}^{milk} + Q_{I_c(t)}^{milk})}{MilkTot_{(t)}},$$

where

$$Q_{I_s(t)}^{milk} = 7 \times \varepsilon \times g_{I_s} \times \left( \sum_1^{nbExcr_{(t)}^{I_s}} (10^5 \cdot Beta(8; 8)) + \sum_1^{nbLac_{(t)}^{I_s}} (1 + 10^3 \cdot Beta(1; 25)) \right) * \varphi Milk_{I_s},$$

$$Q_{I_c(t)}^{milk} = 7 \times \varepsilon \times g_{I_c} \times \left( \sum_1^{nbExcr_{(t)}^{I_c}} (10^5 \cdot Beta(8; 8)) + \sum_1^{nbLac_{(t)}^{I_c}} 10^{(3+10 \cdot Beta(50; 200))} \right) * \varphi Milk_{I_c},$$

$$MilkTot_{(t)} = 7 \times \varepsilon \times (nbLac_{(t)}^R + g_L \cdot nbLac_{(t)}^L + g_{I_s} \cdot nbLac_{(t)}^{I_s} + g_{I_c} \cdot nbLac_{(t)}^{I_c}).$$

with

$$nbExcr_{(t)}^{I_s} \sim Bin (nbLac_{(t)}^{I_s}; sh_{I_s}),$$

$$nbExcr_{(t)}^{I_c} \sim Bin (nbLac_{(t)}^{I_c}; sh_{I_c}),$$

$$nbLac_{(t)}^R \sim Bin \left( \sum_{i=1}^{i=5} R_{(t,P_i)}, prop \right),$$

$$nbLac_{(t)}^L \sim Bin \left( \sum_{i=1}^{i=5} L_{(t,P_i)}, prop \right),$$

$$nbLac_{(t)}^{I_s} \sim Bin \left( \sum_{i=1}^{i=5} Is_{(t,P_i)}, prop \right),$$

$$nbLac_{(t)}^{I_c} \sim Bin \left( \sum_{i=1}^{i=5} Ic_{(t,P_i)}, prop \right).$$

## Local transmission (in collective pens, $a \in [1; u]$ )

$$inf_{(t+1,a)}^l \sim Bin (S_{(t,a-1)} - sS_{(t,a-1)}; p_{inf_{(t+1,a)}^i}),$$

where

during housing period:

$$p_{inf(t+1,a)}^i = 1 - \exp\left(-e^{(-\gamma(a-1))} \cdot \frac{\beta_c E_{(t+1)}^i}{\alpha N_{(t+1)}^i}\right), \text{ and}$$

during grazing period, regarding the age,

$$a \in [1; 26] : p_{inf(t+1,a)}^i = 1 - \exp\left(-e^{(-\gamma(a-1))} \cdot \frac{\beta_c E_{(t+1)}^i}{\alpha N_{(t+1)}^i}\right),$$

$$a \in [27; u] : p_{inf(t+1,a)}^i = 1 - \exp\left(-e^{(-\gamma(a-1))} \cdot \frac{\beta_o E_{(t+1)}^i}{\alpha N_{(t+1)}^i}\right).$$

$N_{(t+1)}^i$  is the total number of animals in environment  $i$ , across all health states, and  $E^i$  represents the quantity of bacteria in the environment, with  $i$  corresponding to the specific area.

### Global transmission

This occurs up to the age allowing to go to the pasture (26 weeks - 6 months) during the grazing period, and up to the age limit for sensitivity ( $u$ ) during the housing period:

$$inf_{(t+1,a)}^g \sim Bin\left(S_{(t,a)} - sS_{(t,a)}; p_{inf(t+1,a)}^g\right),$$

where

$$p_{inf(t+1,a)}^g = 1 - \exp\left(-\exp[-h(a-1)] \cdot \frac{\beta_g E_{(t+1)}^g}{\alpha N_{(t+1)}^g}\right), \text{ with } E_{(t+1)}^g = \sum_{i=1}^{i=5} E_{(t+1)}^{INT^i}$$

$E^{INT^i}$  represents the quantity of bacteria in the environment where  $INT^i$  corresponds to a specific area (see the section below about the dynamics of bacteria in the environments).

### New latently infected ( $T \rightarrow L$ )

For  $a < cal$ :

$$NL_{(t+1,a \in [2; cal-1])} \sim Bin\left(T_{(t,a)} - sT_{(t,a)}; \frac{1}{v_T}\right).$$

After age  $cal$ , there are no more animals in  $T$  state:

$$NL_{(t+1,P_1)} = T_{(t,cal)} - sT_{(t,cal)}.$$

### New subclinically infected ( $\mathbf{L} \rightarrow \mathbf{Is}$ )

For heifers:

$$NIS_{(t+1, a \in [h+1; cal])} \sim Bin \left( L_{(t, a)} - sL_{(t, a)}; \frac{1}{v_L} \right).$$

For cows:

$$NIS_{(t+1, P_i)} \sim Bin \left( n; \frac{1}{v_L} \right),$$

with, regarding the age,

$$\begin{aligned} P_1 \rightarrow n &= \left[ L_{(t, P_1)}^{sg} - sL_{(t, P_1)}^{sg} + L_{(t, cal)} - sL_{(t, cal)} + T_{(t, cal)} - sT_{(t, cal)} \right], \\ \{P_2; P_4\} \rightarrow n &= \left[ L_{(t, P_i)}^{sg} - sL_{(t, P_i)}^{sg} + L_{(t, P_{i-1})}^{ng} - sL_{(t, P_{i-1})}^{ng} \right], \\ P_{5+} \rightarrow n &= \left[ L_{(t, P_{5+})} - sL_{(t, P_{5+})} + L_{(t, P_4)}^{ng} - sL_{(t, P_4)}^{ng} \right]. \end{aligned}$$

### New clinically infected ( $\mathbf{Is} \rightarrow \mathbf{Ic}$ )

For heifers:

$$NIC_{(t+1, a \in [h+1; cal])} \sim Bin \left( IS_{(t, a)} - sIS_{(t, a)}; \frac{1}{v_{Is}} \right).$$

For cows:

$$NIC_{(t+1, P_i)} \sim Bin \left( n; \frac{1}{v_{Is}} \right),$$

with

$$\begin{aligned} P_1 \rightarrow n &= \left[ IS_{(t, P_1)}^{sg} - sIS_{(t, P_1)}^{sg} + IS_{(t, cal)} - sIS_{(t, cal)} \right], \\ \{P_2; P_4\} \rightarrow n &= \left[ IS_{(t, P_i)}^{sg} - sIS_{(t, P_i)}^{sg} + IS_{(t, P_{i-1})}^{ng} - sIS_{(t, P_{i-1})}^{ng} \right], \\ P_{5+} \rightarrow n &= \left[ IS_{(t, P_{5+})} - sIS_{(t, P_{5+})} + IS_{(t, P_4)}^{ng} - sIS_{(t, P_4)}^{ng} \right]. \end{aligned}$$

### New resistant ( $\mathbf{S} \rightarrow \mathbf{R}$ )

At age  $u$ , the transition from compartment S to compartment R is done in a deterministic way.

### Dynamics of bacteria in the environments ( $\mathbf{E}$ )

The composition of the environments according to the season is the following:

$$\text{Grazing : } a = \overbrace{1 \dots \dots \dots w}^{\text{INT1}} \overbrace{\dots \dots \dots 26}^{\text{INT2}} \overbrace{\dots \dots \dots h}^{\text{EXT1+EXT2}} \overbrace{\dots \dots \dots cal}^{\text{EXT3}}$$



$$\text{Housing : } a = \overbrace{1 \dots \dots \dots w}^{\text{INT1}} \overbrace{\dots \dots \dots y}^{\text{INT2}} \overbrace{\dots \dots \dots h}^{\text{INT3}} \overbrace{\dots \dots \dots cal}^{\text{INT4}}$$

Dynamics of bacteria in the environments ( $E$ ) are defined below:

$E_{(t+1)}^{\text{INT1}} = E_{(t)}^{\text{INT1}} \cdot (1 - \mu_g^{\text{int}}) + Q_{(t)}^{\text{TNS}}$ . If pens are empty, it becomes  $E_{(t+1)}^{\text{INT1}} = E_{(t+1)}^{\text{INT1}} \cdot (1 - \mu_{cp})$ , where  $Q$  represents the quantity of bacteria shed.

During grazing period, we have:

$$E_{(t+1)}^{\text{INT2}} = E_{(t)}^{\text{INT2}} \cdot (1 - \mu_g^{\text{int}}) + Q_{(t)}^{\text{Ts1}}$$

$$\text{If } \sum_{a=w+1}^{a=26} SR_{t,a} + \sum_{a=w+1}^{a=26} T_{t,a} + \sum_{a=w+1}^{a=26} L_{t,a} == 0 \text{ then } E_{(t+1)}^{\text{INT2}} = E_{(t+1)}^{\text{INT2}} \cdot (1 - \mu_{cp})$$

$$E_{(t+1)}^{\text{INT3}} = E_{(t)}^{\text{INT3}} \cdot (1 - \mu_g^{\text{int}})$$

$$E_{(t+1)}^{\text{INT4}} = E_{(t)}^{\text{INT4}} \cdot (1 - \mu_g^{\text{int}})$$

$$E_{(t+1)}^{\text{INT5}} = E_{(t)}^{\text{INT5}} \cdot (1 - \mu_g^{\text{int}})$$

$$E_{(t+1)}^{\text{EXT1}} = E_{(t)}^{\text{EXT1}} \cdot (1 - \mu_g^{\text{ext}}) + Q_{(t)}^{\text{Ts2}}$$

$$E_{(t+1)}^{\text{EXT2}} = E_{(t)}^{\text{EXT2}} \cdot (1 - \mu_g^{\text{ext}}) + Q_{(t)}^{\text{TY}}$$

$$E_{(t+1)}^{\text{EXT3}} = E_{(t)}^{\text{EXT3}} \cdot (1 - \mu_g^{\text{ext}}) + Q_{(t)}^{\text{TH}} + Q_{(t)}^{\text{ISH}} + Q_{(t)}^{\text{ICH}}.$$

During housing period, we have:

$$E_{(t+1)}^{\text{INT2}} = E_{(t)}^{\text{INT2}} \cdot (1 - \mu_g^{\text{int}}) + Q_{(t)}^{\text{Ts1}} + Q_{(t)}^{\text{Ts2}}$$

$$\text{If } \sum_{a=w+1}^{a=52} SR_{t,a} + \sum_{a=w+1}^{a=52} T_{t,a} + \sum_{a=w+1}^{a=52} L_{t,a} == 0 \text{ then } E_{(t+1)}^{\text{INT2}} = E_{(t+1)}^{\text{INT2}} \cdot (1 - \mu_{cp})$$

$$E_{(t+1)}^{\text{INT3}} = E_{(t)}^{\text{INT3}} \cdot (1 - \mu_g^{\text{int}}) + Q_{(t)}^{\text{TY}}$$

$$E_{(t+1)}^{\text{INT4}} = E_{(t)}^{\text{INT4}} \cdot (1 - \mu_g^{\text{int}}) + Q_{(t)}^{\text{TH}} + Q_{(t)}^{\text{ISH}} + Q_{(t)}^{\text{ICH}}$$

$$E_{(t+1)}^{\text{INT5}} = E_{(t)}^{\text{INT5}} \cdot (1 - \mu_g^{\text{int}}) + Q_{(t)}^{\text{IS}} + Q_{(t)}^{\text{IC}}$$

$$E_{(t+1)}^{\text{EXT1}} = 0, \quad E_{(t+1)}^{\text{EXT2}} = 0, \quad E_{(t+1)}^{\text{EXT3}} = 0.$$

Shed quantities of bacteria are defined, regarding the health states and the age, by:

unweaned calves T:

$$Q_{(t)}^{\text{TNS}} = \sum_{a=1}^{a=w} \left[ 7 \cdot f_1 \cdot 10^6 \cdot \sum_{T_{t,a}} \text{Beta}(8.8; 19) \right] * \varphi faeces_T,$$

weaned calves T, without access to grazing:

$$Q_{(t)}^{\text{Ts1}} = \sum_{a=w+1}^{a=26} \left[ 7 \cdot f_2 \cdot 10^6 \cdot \sum_{T_{t,a}} \text{Beta}(8.8; 19) \right] * \varphi faeces_T,$$

weaned calves T, with access to grazing:

$$Q_{(t)}^{Ts2} = \sum_{a=27}^{a=y} \left[ 7.f_2.10^6 \cdot \sum^{T_{(t,a)}} \text{Beta}(8.8; 19) \right] * \varphi faeces_T,$$

young heifers T:

$$Q_{(t)}^{TY} = \sum_{a=y+1}^{a=h} \left[ 7.f_Y.10^6 \cdot \sum^{T_{(t,a)}} \text{Beta}(8.8; 19) \right] * \varphi faeces_T,$$

heifers T:

$$Q_{(t)}^{TH} = \sum_{a=h+1}^{a=cal} \left[ 7.f_A.10^6 \cdot \sum^{T_{(t,a)}} \text{Beta}(8.8; 19) \right] * \varphi faeces_T,$$

heifers Is:

$$\text{if } \sum_{a=h+1}^{a=cal} (Is_{(t,a)}) > 0 : Q_{(t)}^{ISH} = \sum_{a=h+1}^{a=cal} \left[ 7.f_A.10^{(4+10 \times \sum^{Is_{(t,a)}} \text{Beta}(2.65; 17))} \right] * \varphi faeces_{Is}$$

$$\text{else } Q_{(t)}^{ISH} = 0,$$

cows Is:

$$\text{if } \sum_{i=1}^{i=5} (Is_{(t,P_i)}) > 0 : Q_{(t)}^{IS} = \sum_{i=1}^{i=5} \left[ 7.f_A.10^{(4+10 \times \sum^{Is_{(t,P_i)}} \text{Beta}(2.65; 17))} \right] * \varphi faeces_{Is}$$

$$\text{else } Q_{(t)}^{IS} = 0,$$

heifers Ic:

$$\text{if } \sum_{a=h+1}^{a=cal} (Ic_{(t,a)}) > 0 : Q_{(t)}^{ICH} = \sum_{a=h+1}^{a=cal} \left[ 7.f_A.10^{(8+10 \times \sum^{Ic_{(t,a)}} \text{Beta}(2; 17))} \right] * \varphi faeces_{Ic}$$

$$\text{else } Q_{(t)}^{ICH} = 0,$$

cows Ic:

$$\text{if } \sum_{i=1}^{i=5} (Ic_{(t,P_i)}) > 0 : Q_{(t)}^{IC} = \sum_{i=1}^{i=5} \left[ 7.f_A.10^{(8+10 \times \sum^{Ic_{(t,P_i)}} \text{Beta}(2; 17))} \right] * \varphi faeces_{Ic}$$

$$\text{else } Q_{(t)}^{IC} = 0.$$

$\varphi faeces_x$ , in the equation above is a factor of decrease in quantity of bacteria shed by an animal in health state  $x$ .  $x$  could be  $T$ ,  $Is$  or  $Ic$ .

## B Parameters related to population dynamics

**Table 1:** Parameters for management and population dynamics used in the *Mycobacterium avium subsp. paratuberculosis* (*Map*) infection dynamics model within a structured dairy herd (reproduced from [2], Table 1).

| Notation      | Value                        | Definition                                                                               | Source  |
|---------------|------------------------------|------------------------------------------------------------------------------------------|---------|
| $\sigma_B$    | 0.07                         | Mortality rate of calves at birth                                                        | *, [17] |
| $\sigma_m$    | 0.206                        | Exit rate of male calves, weeks 2 to 4 (per week)                                        |         |
| $\sigma_{c1}$ | 0.015                        | Death rate of female calves, weeks 1 and 2 (per week)                                    | [17]    |
| $\sigma_{c2}$ | 0.0035                       | Death rate of female calves, weeks 3 to weaning (per week)                               | [9]     |
| $\sigma_{c3}$ | 0.00019                      | Death rate of heifers from weaning to entry in adult group (per week)                    | †       |
| $\sigma_h$    | 0.011                        | Sale rate of blackcol heifers 10 weeks before 1st calving                                | †       |
| $\sigma_{Ai}$ | 0.27,0.25,0.31,<br>0.31,0.62 | Yearly culling rate of cows in adult group $i$ : 1, 2, 3, 4 and above 5 respectively (%) | *, [1]  |
| $w$           | 10                           | Weaning age (weeks)                                                                      | [12]    |
| $y$           | 52                           | Age when entering the young heifer group (weeks)                                         |         |
| $h$           | 91                           | Age when entering the heifer group (weeks)                                               | *       |
| $cal$         | 130                          | Age when entering the adult group (weeks)                                                | *, †    |
| $\tau_{aa}$   | 56.3                         | Mean time spent in adult age groups 1 to 4 (weeks)                                       | *, †    |
| $b$           | 5                            | Quantity of colostrum fed to calves (L/day for 3 days)                                   | †       |
| $d$           | 7                            | Quantity of milk fed to calves after 3 days (L/day/calf)                                 | †       |
| $prop$        | 0.85                         | Proportion of lactating cows                                                             | *       |
| $\varepsilon$ | 25                           | Quantity of milk or colostrum produced (L/day/cow)                                       | *       |
| $f_1$         | 0.5                          | Quantity of faeces produced by a non-weaned calf (kg/day)                                | †       |
| $f_2$         | 5.5                          | Quantity of faeces produced by a weaned calf (kg/day)                                    | †       |
| $f_Y$         | 10                           | Quantity of faeces produced by a heifer (kg/day)                                         | †       |
| $f_A$         | 30                           | Quantity of faeces produced by a cow (kg/day)                                            | †       |
| $Graz$        | [14 – 26]                    | Grazing period (1 being the first week of the year)                                      | †       |
| $K_c$         | 110                          | Number of cows above which the heifer selling rate increases                             |         |

\* Agricultural statistics.

† Based on expert opinion.

## C Parameters related to infection dynamics

**Table 2:** Parameters for infection and transmission used in the *Mycobacterium avium subsp. paratuberculosis* (*Map*) infection dynamics model within a structublackcol dairy herd (reproduced from [2] - Table 2).

| Notation  | Value                         | Definition                                                                                             | Source   |
|-----------|-------------------------------|--------------------------------------------------------------------------------------------------------|----------|
| $p_X$     | $p_L = 0.149$                 | Probability of <i>in utero</i> transmission for cow in health state $X$<br>$X =$ latently infected (L) | [4, 26]  |
|           | $p_{I_s} = 0.149$             | $X =$ subclinically infected (Is)                                                                      |          |
|           | $p_{I_c} = 0.65$              | $X =$ clinically affected (Ic)                                                                         |          |
| $u$       | 52                            | Maximal age in the susceptible compartment (weeks)                                                     | [6, 23]  |
| $\gamma$  | 0.1                           | Susceptibility follows an exponential decrease : $exp(-\gamma(\text{age} - 1))$                        | [27]     |
| $v_X$     |                               | Mean time spent in health state $X$ (weeks)                                                            |          |
|           | $v_T = 25$                    | $X =$ transiently infectious (T)                                                                       | [21]     |
|           | $v_L = 52$                    | $X =$ latently infected (L)                                                                            | [16, 14] |
|           | $v_{I_s} = 104$               | $X =$ subclinically infected (Is)                                                                      | [13]     |
| $sh_X$    | $v_{I_c} = 26$                | $X =$ clinically affected (Ic)                                                                         | †        |
|           |                               | Probability of shedding in colostrum or milk for a cow in health state $X$                             | [20, 19] |
|           | $sh_L = 0$                    | $X =$ latently infected (L)                                                                            |          |
|           | $sh_{I_s} = 0.4$              | $X =$ subclinically infected (Is)                                                                      |          |
|           | $sh_{I_c} = 0.9$              | $X =$ clinically affected (Ic)                                                                         |          |
| $\alpha$  | $10^6$                        | <i>Map</i> infectious dose                                                                             | [3]      |
| $\beta_l$ | $5 \times 10^{-4} \times 7$   | Transmission rate if ingestion of an infectious dose (per week)                                        | ‡        |
| $\beta_c$ | $5 \times 10^{-5} \times 7$   | Transmission rate if one infectious dose is present in the local environment (per week)                | [21]     |
| $\beta_g$ | $9.5 \times 10^{-7} \times 7$ | Transmission rate if one infectious dose is present in the global environment (per week)               | [21]     |
| $\beta_o$ | $5 \times 10^{-6} \times 7$   | Transmission rate if one infectious dose is present in the pasture (per week)                          | ‡        |
| $g_X$     |                               | Decrease in milk production for cattle in health state $X$ (per week)                                  | [15]     |
|           | $g_{I_s} = 1 - 0.11$          | $X =$ subclinically infected (Is)                                                                      |          |
|           | $g_{I_c} = 1 - 0.25$          | $X =$ clinically affected (Ic)                                                                         |          |
| $\mu_k$   |                               | Removal rate of <i>Map</i> from environment k                                                          | [7, 24]  |
|           | $\mu_g^{int} = 0.4$           | all the environments (per week)                                                                        |          |
|           | $\mu_g^{ext} = 1/14$          | all the environments (per week)                                                                        |          |
|           | $\mu_{cp} = 0.17$             | collective pens (when empty)                                                                           |          |

† Expert opinions.

‡ Parameters' values are assumed.

**Table 3:** Summary of published data and assumed distributions of the quantities of *Mycobacterium avium* subsp. *paratuberculosis* (*Map*) shed, depending on the health state (X) and the route of transmission (r) in the *Map* infection dynamics model within a structblackcol dairy herd (reproduced from [2] - Table 3).

| Route of transmission (r)                                                  | Health state (X)       |                   | Literature         |                   | Assumed distributions |                                            |
|----------------------------------------------------------------------------|------------------------|-------------------|--------------------|-------------------|-----------------------|--------------------------------------------|
|                                                                            | Minimal value          | Maximal value     | Minimal value      | Maximal value     | Mean value            | Source                                     |
| Map direct shedding in milk and colostrum (Map/L)                          | Subclinically infected | $2.2 \times 10^4$ | $8.8 \times 10^4$  | $5 \times 10^4$   | $5 \times 10^4$       | $10^5 \times \text{Beta}(8; 8)$            |
|                                                                            | Clinically affected    | -                 | -                  | $5 \times 10^4$   | $5 \times 10^4$       | $10^5 \times \text{Beta}(8; 8)$            |
| Map indirect shedding in milk and colostrum (faecal contamination) (Map/L) | Subclinically infected | 0                 | $2 \times 10^{10}$ | 40                | 40                    | $1 + 10^3 \times \text{Beta}(1; 25)$       |
|                                                                            | Clinically affected    | 700               | $2 \times 10^{10}$ | $14 \times 10^4$  | $14 \times 10^4$      | $10^{(3+10 \times \text{Beta}(50; 200))}$  |
| Map shedding in faeces (Map/kg)                                            | Transiently infectious | $6 \times 10^4$   | $6.3 \times 10^5$  | $3 \times 10^5$   | $3 \times 10^5$       | $10^6 \times \text{Beta}(8.8; 19)$         |
|                                                                            | Subclinically infected | $10^4$            | $10^{15}$          | $2.6 \times 10^6$ | $2.6 \times 10^6$     | $10^{(4+10 \times \text{Beta}(2.65; 17))}$ |
|                                                                            | Clinically affected    | $10^8$            | $10^{15}$          | $10^{10}$         | $10^{10}$             | $10^{(8+10 \times \text{Beta}(2; 17))}$    |

## Bibliography

- [1] Beaudéau, F. (1999). *Review of culling and replacement practices in dairy cattle herds*, Master Thesis. Institut Supérieur des Productions Animales. PhD thesis, Rennes, France.
- [2] Beaunée, G., Vergu, E., and Ezanno, P. (2015). Modelling of paratuberculosis spread between dairy cattle farms at a regional scale. *Veterinary Research*, 46:1–13.
- [3] Begg, D. J. and Whittington, R. J. (2008). Experimental animal infection models for Johne’s disease, an infectious enteropathy caused by *Mycobacterium avium* subsp. paratuberculosis. *The Veterinary Journal*, 176(2):129–145.
- [4] Benedictus, A., Mitchell, R. M., Linde-Widmann, M., Sweeney, R., Fyock, T., Schukken, Y. H., and Whitlock, R. H. (2008). Transmission parameters of *Mycobacterium avium* subspecies paratuberculosis infections in a dairy herd going through a control program. *Preventive Veterinary Medicine*, 83(3-4):215–227.
- [5] Giese, S. B. and Ahrens, P. (2000). Detection of *Mycobacterium avium* subsp paratuberculosis in milk from clinically affected cows by PCR and culture. *Veterinary Microbiology*, 77(3-4):291–297.
- [6] Hagan, W. A. (1938). Age as a Factor in Susceptibility to Johne’s Disease. *Cornell Veterinarian*, 28:34–40.
- [7] Jørgensen, J. B. (1977). Survival of *Mycobacterium paratuberculosis* in slurry. *Nordisk Veterinær Medicin*, 29(6):267–270.
- [8] Jørgensen, J. B. (1982). An improved medium for culture of *Mycobacterium paratuberculosis* from bovine faeces. *Acta veterinaria Scandinavica*, 23(3):325–335.
- [9] Jégou, V., Porhiel, J., and Brunschwig, P. (2006). Risk management factors affecting mortality among dairy calves herds in 80 herds in Brittany. In *Proc. Journées Bovines Nantaises*, Nantes.
- [10] Magnusson, M., Christiansson, A., Svensson, B., and Kolstrup, C. (2006). Effect of Different Premilking Manual Teat-Cleaning Methods on Bacterial Spores in Milk. *Journal of Dairy Science*, 89(10):3866–3875.
- [11] Marcé, C., Ezanno, P., Seegers, H., Pfeiffer, D. U., and Fourichon, C. (2011). Predicting fadeout versus persistence of paratuberculosis in a dairy cattle herd for management and control purposes: a modelling study. *Veterinary Research*, 42(36).
- [12] Marcé, C., Guatteo, R., Bareille, N., and Fourichon, C. (2010). Dairy calf housing systems across Europe and risk for calf infectious diseases. *animal*, 4(09):1588–1596.
- [13] Matthews, H. T. (1947). On Johne’s disease. *The Veterinary Record*, 59(31):397–401.

- [14] Nielsen, S. S. (2008). Transitions in diagnostic tests used for detection of *Mycobacterium avium* subsp. paratuberculosis infections in cattle. *Veterinary Microbiology*, 132(3-4):274–282.
- [15] Nielsen, S. S., Enevoldsen, C., and Toft, N. (2006). Milk production losses associated with bovine paratuberculosis diagnosed from repeated testing. In *11th international Symposia of Veterinary Epidemiology and Economics*, Cairns.
- [16] Nielsen, S. S. and Ersbøll, A. K. (2006). Age at Occurrence of *Mycobacterium avium* Subspecies paratuberculosis in Naturally Infected Dairy Cows. *Journal of Dairy Science*, 89(12):4557–4566.
- [17] Rio, O. (1999). *Frequency and risks of mortality and health disorders of calves in dairy cattle herds*. PhD thesis, Nantes.
- [18] Rossiter, C. A. and Burhans, W. S. (1996). Farm-specific approach to paratuberculosis (Johne’s disease) control. *The Veterinary clinics of North America. Food animal practice*, 12(2):383–415.
- [19] Streeter, R. N., Hoffsis, G. F., Bechnielsen, S., Shulaw, W. P., and Rings, M. (1995). Isolation of *Mycobacterium-Paratuberculosis* From Colostrum and Milk of Subclinically Infected Cows. *American Journal of Veterinary Research*, 56(10):1322–1324.
- [20] Sweeney, R. W., Whitlock, R. H., and Rosenberger, A. E. (1992). *Mycobacterium paratuberculosis* isolated from fetuses of infected cows not manifesting signs of the disease. *American Journal of Veterinary Research*, 53(4):477–480.
- [21] van Roermund, H. J. W., Bakker, D., Willemsen, P. T. J., and de Jong, M. C. M. (2007). Horizontal transmission of *Mycobacterium avium* subsp. paratuberculosis in cattle in an experimental setting: Calves can transmit the infection to other calves. *Veterinary Microbiology*, 122(3-4):270–279.
- [22] Vissers, M. M. M., Driehuis, F., Te Giffel, M. C., De Jong, P., and Lankveld, J. M. G. (2006). Improving Farm Management by Modeling the Contamination of Farm Tank Milk with Butyric Acid Bacteria. *Journal of Dairy Science*, 89(3):850–858.
- [23] Whitlock, R. H. and Buergelt, C. (1996). Preclinical and clinical manifestations of paratuberculosis (including pathology). *Veterinary Clinics of North America-Food Animal Practice*, 12(2):345–356.
- [24] Whittington, R. J., Marshall, D. J., Nicholls, P. J., Marsh, I. B., and Reddacliff, L. A. (2004). Survival and dormancy of *Mycobacterium avium* subsp. paratuberculosis in the environment. *Applied and Environmental Microbiology*, 70(5):2989–3004.
- [25] Whittington, R. J., Reddacliff, L. A., Marsh, I., McAllister, S., and Saunders, V. (2000). Temporal patterns and quantification of excretion of *Mycobacterium avium* subsp paratuberculosis in sheep with Johne’s disease. *Australian Veterinary Journal*, 78(1):34–37.
- [26] Whittington, R. J. and Windsor, P. A. (2009). In utero infection of cattle with *Mycobacterium avium* subsp. paratuberculosis: A critical review and meta-analysis. *The Veterinary Journal*, 179(1):60–69.

- [27] Windsor, P. A. and Whittington, R. J. (2010). Evidence for age susceptibility of cattle to Johne's disease. *The Veterinary Journal*, 184(1):37–44.
